# Supplementary material for: Role of the B′-site metal ion in the framework structures and dielectric transitions in host–guest type cyanometalates (HIm)2[B′Co(CN)6] (HIm = imidazolium cation)
Source: Royal Society of Chemistry journal article supplement (doi:10.1039/c9ce01739a), 2020-01-01
Supplement: c9ce01739a1.pdf [file c9ce01739a1.pdf]

## Supporting Information

### Experimental

**Sample preparation.** Aqueous solution (30 mL) containing  $\text{Na}_3[\text{Co}(\text{CN})_6]$  (2.84 g, 10 mmol) and  $(\text{HIm})\text{Cl}$  (3.14 g, 30 mmol) was evaporated slowly at room temperature over two weeks, affording pale yellow crystals of **Na**. Block yellow crystal of **Rb** was collected by the similar method but using  $\text{Rb}_3[\text{Co}(\text{CN})_6]$  (4.71 g, 10 mmol) instead of  $\text{Na}_3[\text{Co}(\text{CN})_6]$ .

**Na:** yield 90% (based on Co). Elemental analysis calcd (%) for  $\text{C}_{12}\text{H}_{12}\text{CoN}_{10}\text{NaO}$  (394.24): C 35.65, H 5.48, N 34.64; found: C 35.30, H 5.79, N 34.84. FTIR for **Na** (KBr): 3160, 2135, 2116, 1590, 1427, 1198, 1050, 762, 622  $\text{cm}^{-1}$ .

**Rb:** yield 85% (based on Co). Elemental analysis calcd (%) for  $\text{C}_{12}\text{H}_{10}\text{CoN}_{10}\text{Rb}$  (438.70): C 32.12, H 4.49, N 32.21; found: C 32.09, H 4.98, N 32.62. FTIR for **Rb** (KBr): 3165, 2121, 1586, 1090, 1046, 751, 621  $\text{cm}^{-1}$ .

**Measurements.** Elemental analysis of C, H and N was conducted on a vario MICRO analyzer. Thermal gravimetric analysis (TGA) was performed on a TA Instruments Q500 in air flow. A Nicolet 5700 spectrometer was used to receive the infrared (IR) spectra. Powder X-ray diffraction (PXRD) was measured by a Rigaku SmartLab X-ray diffraction instrument to confirm the purity of the samples. Differential scanning calorimetry (DSC) measurements were carried out on a NETZSCH DSC 200F3 instrument with a cooling/heating rate of 5  $\text{K min}^{-1}$  in the temperature ranges of 103–293 K. Dielectric constant curves were collected by a Tonghui TH2828A impedance analyzer within an applied electric field of 1.0 V.

**Single-crystal X-ray crystallography.** A Rigaku Saturn 724<sup>+</sup> diffractometer using  $\text{Mo-K}\alpha$  ( $\lambda = 0.71073 \text{ \AA}$ ) radiation from a graphite monochromator equipped with gas spray cooler device was used to collect single-crystal data of compound **Na** and **Rb**. The bonds of C–H and N–H were placed in calculated positions, with C–H = 0.93  $\text{\AA}$  and  $U_{\text{iso}}(\text{H}) = 1.2 U_{\text{eq}}(\text{C})$  for imidazolium H atoms and N–H = 0.86  $\text{\AA}$  and  $U_{\text{iso}}(\text{H}) =$

1.2  $U_{\text{eq}}(\text{N})$ . The water H atoms were located in difference Fourier syntheses and refined with an O–H distance restraint of 0.85 Å and with  $U_{\text{iso}}(\text{H}) = 1.5 U_{\text{eq}}(\text{O})$ . Crystallographic data and structural refinement details, selected bond lengths and bond angles, details of hydrogen bonding interactions are given in Table S1–2.

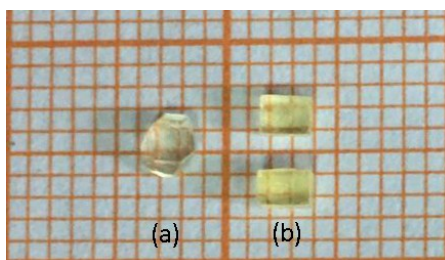

**Figure S1.** Crystal morphology of (a) **Na** and (b) **Rb**.

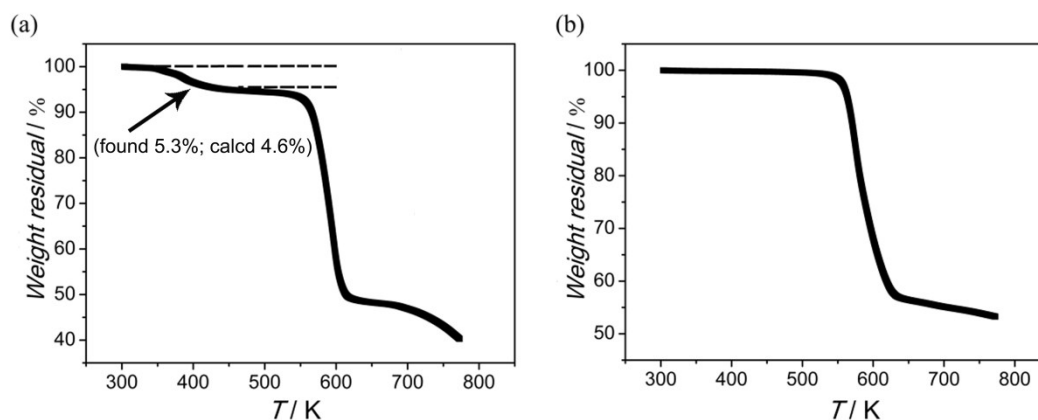

**Figure S2.** TGA curves of (a) **Na** and (b) **Rb**.

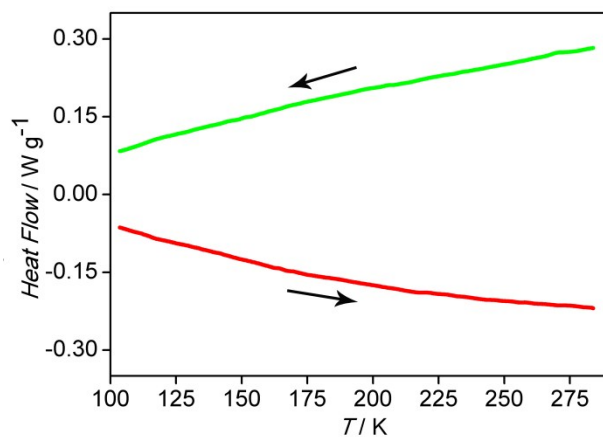

**Figure S3.** DSC curves of Na measured in the temperature range 100–290 K.

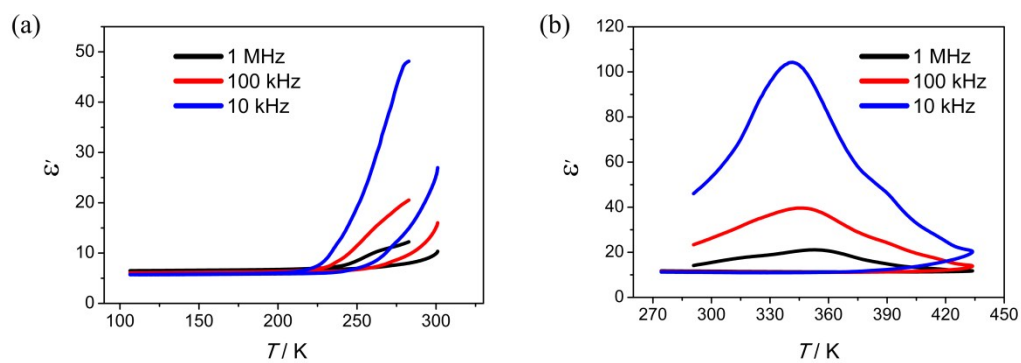

**Figure S4.** The  $\epsilon''$  vs  $T$  of Na on the power state in the different frequency and temperature ranges of 100–430 K.

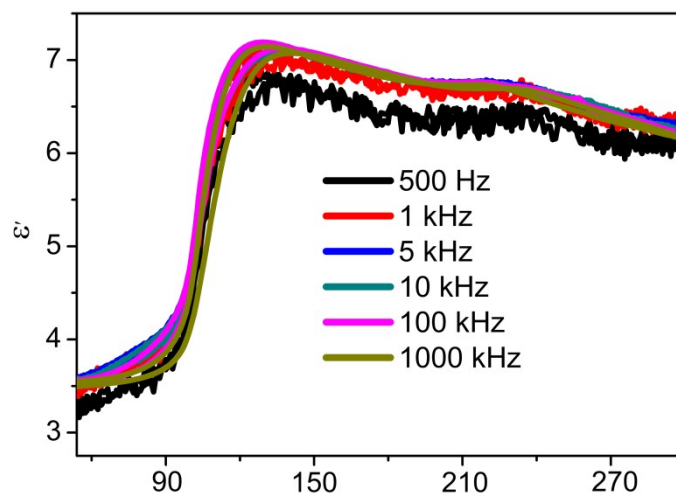

**Figure S5.** The  $\epsilon'$  vs  $T$  of **Rb** on the power state in the different frequency and temperature ranges of 63–293 K.

**Table S1.** Bond lengths (Å) and bond angles (°) for **Na and Rb**.

|                                                                                                           |            |                     |            |
|-----------------------------------------------------------------------------------------------------------|------------|---------------------|------------|
| <b>Na (293 K)</b>                                                                                         |            |                     |            |
| Na(1)–N(1)                                                                                                | 2.4140(17) | N(1)#5–Na(1)–N(1)   | 134.94(9)  |
| Na(1)–N(1)#5                                                                                              | 2.4139(17) | N(1)–Na(1)–N(2)#2   | 102.25(5)  |
| Na(1)–N(2)#2                                                                                              | 2.477(2)   | N(1)–Na(1)–O(1)     | 78.46(5)   |
| Na(1)–N(5)#4                                                                                              | 2.371(2)   | N(2)#2–Na(1)–O(1)   | 65.08(7)   |
| Na(1)–O(1)                                                                                                | 2.955(2)   | N(5)#4–Na(1)–N(1)   | 99.39(5)   |
|                                                                                                           |            | N(5)#4–Na(1)–N(2)#2 | 121.17(10) |
|                                                                                                           |            | N(5)#4–Na(1)–O(1)   | 173.75(8)  |
| Symmetry codes: #2 $-x, -y, -z$ ; #4 $-x+1/2, -y, z-1/2$ ; #5 $x, -y-1/2, z$ .                            |            |                     |            |
| <b>Rb (293 K)</b>                                                                                         |            |                     |            |
| Rb(1)–N(1)                                                                                                | 2.994(4)   | N(1)–Rb(1)–N(1)#6   | 83.00(12)  |
|                                                                                                           |            | N(1)–Rb(1)–N(1)#7   | 97.00(12)  |
|                                                                                                           |            | N(1)–Rb(1)–N(1)#9   | 180.0      |
| Symmetry codes: #6 $x-y+2/3, x+1/3, -z+4/3$ ; #7 $x-y+2/3, x+1/3, -z+4/3$ ; #9 $x-y+2/3, x+1/3, -z+4/3$ . |            |                     |            |
| <b>Rb (193 K)</b>                                                                                         |            |                     |            |
| Rb(1)–N(1)                                                                                                | 2.979(6)   | N(1)–Rb(1)–N(1)#6   | 82.36(18)  |
|                                                                                                           |            | N(1)–Rb(1)–N(1)#8   | 97.64(18)  |
|                                                                                                           |            | N(1)–Rb(1)–N(1)#10  | 180.0      |
| Symmetry codes: #6 $y-1/3, -x+y+1/3, -z+1/3$ ; #8 $-y+1, x-y+1, z$ ; #10 $-x+2/3, -y+4/3, -z+1/3$ .       |            |                     |            |
| <b>Rb (93 K)</b>                                                                                          |            |                     |            |
| Rb(1)–N(1)                                                                                                | 2.972(6)   | N(1)–Rb(1)–N(1)#8   | 93.2(3)    |
| Rb(1)–N(2)                                                                                                | 2.968(5)   | N(1)–Rb(1)–N(2)     | 82.65(18)  |
| Rb(1)–N(3)                                                                                                | 2.995(6)   | N(1)–Rb(1)–N(2)#8   | 105.9(2)   |
|                                                                                                           |            | N(1)–Rb(1)–N(3)     | 95.55(17)  |
|                                                                                                           |            | N(1)–Rb(1)–N(3)#8   | 169.5(2)   |
|                                                                                                           |            | N(2)–Rb(1)–N(2)#8   | 167.7(3)   |
|                                                                                                           |            | N(2)–Rb(1)–N(3)     | 81.1(2)    |
|                                                                                                           |            | N(2)–Rb(1)–N(3)#8   | 89.28(18)  |
|                                                                                                           |            | N(3)–Rb(1)–N(3)#8   | 76.4(3)    |
| Symmetry codes: #8 $-x+1, y, -z+1/2$ .                                                                    |            |                     |            |

**Table S2.** Hydrogen bonds (Å, °) for **Na** and **Rb**.

|                                                                                       | H···A   | D···A     | D–H···A |
|---------------------------------------------------------------------------------------|---------|-----------|---------|
| D–H···A                                                                               |         |           |         |
| <b>Na</b> (293 K)                                                                     |         |           |         |
| N7–H7A···N3#3                                                                         | 2.18    | 2.955(2)  | 149.0   |
| N8–H8A···O1#4                                                                         | 2.08    | 2.872(2)  | 149.9   |
| O1–H1WA···N6#6                                                                        | 1.91(2) | 2.765(3)  | 170(2)  |
| Symmetry codes: #3 $-x+1/2, -y, z+1/2$ ; #4 $-x+1/2, -y, z-1/2$ ; #6 $-x, -y, -z+1$ . |         |           |         |
| <b>Rb</b> (93 K)                                                                      |         |           |         |
| N(4)–H(4B)···N(1)#4                                                                   | 2.19    | 3.015(10) | 161     |
| N(5)–H(5B)···N(3)#9                                                                   | 2.60    | 3.248(11) | 133     |
| Symmetry codes: #4 $-x+1/2, -y+1/2, -z$ ; #9 $-x+1/2, y-1/2, -z+1/2$ .                |         |           |         |
